# Supplementary material for: Improved cancer biomarkers identification using network-constrained infinite latent feature selection
Source: PLoS One. 2021 Feb 11;16(2):e0246668. doi: 10.1371/journal.pone.0246668 (PMC7877636; doi:10.1371/journal.pone.0246668)
Supplement: S9 Table — (XLSX) [file pone.0246668.s010.xlsx]

## Sheet: BRCA
Method	Summary Report
ILFS	3 / 37 gene sets are upregulated in phenotype Tumor 0 gene sets are significant at FDR < 25% 0 gene sets are significantly enriched at nominal pvalue < 1% 0 gene sets are significantly enriched at nominal pvalue < 5%
LASSO	58 / 73 gene sets are upregulated in phenotype Tumor 0 gene sets are significant at FDR < 25% 0 gene sets are significantly enriched at nominal pvalue < 1% 2 gene sets are significantly enriched at nominal pvalue < 5%
MRMR	4 / 29 gene sets are upregulated in phenotype Tumor 0 gene sets are significant at FDR < 25% 0 gene sets are significantly enriched at nominal pvalue < 1% 0 gene sets are significantly enriched at nominal pvalue < 5%
NCILFS	107 / 109 gene sets are upregulated in phenotype Tumor 10 gene sets are significant at FDR < 25% 1 gene sets are significantly enriched at nominal pvalue < 1% 14 gene sets are significantly enriched at nominal pvalue < 5%
PLS-DA	3 / 28 gene sets are upregulated in phenotype Tumor 0 gene sets are significant at FDR < 25% 0 gene sets are significantly enriched at nominal pvalue < 1% 0 gene sets are significantly enriched at nominal pvalue < 5%
RELIEF	18 / 43 gene sets are upregulated in phenotype Tumor 0 gene sets are significant at FDR < 25% 0 gene sets are significantly enriched at nominal pvalue < 1% 0 gene sets are significantly enriched at nominal pvalue < 5%

## Sheet: COAD
Method	Summary Report
ILFS	3 / 13 gene sets are upregulated in phenotype Tumor 0 gene sets are significant at FDR < 25% 0 gene sets are significantly enriched at nominal pvalue < 1% 0 gene sets are significantly enriched at nominal pvalue < 5%
LASSO	14 / 37 gene sets are upregulated in phenotype Tumor 0 gene sets are significant at FDR < 25% 0 gene sets are significantly enriched at nominal pvalue < 1% 0 gene sets are significantly enriched at nominal pvalue < 5%
MRMR	1 / 19 gene sets are upregulated in phenotype Tumor 0 gene sets are significant at FDR < 25% 0 gene sets are significantly enriched at nominal pvalue < 1% 0 gene sets are significantly enriched at nominal pvalue < 5%
NCILFS	100 / 108 gene sets are upregulated in phenotype Tumor 0 gene sets are significant at FDR < 25% 0 gene sets are significantly enriched at nominal pvalue < 1% 0 gene sets are significantly enriched at nominal pvalue < 5%
PLS-DA	3 / 15 gene sets are upregulated in phenotype Tumor 0 gene sets are significant at FDR < 25% 0 gene sets are significantly enriched at nominal pvalue < 1% 0 gene sets are significantly enriched at nominal pvalue < 5%
RELIEF	40 / 49 gene sets are upregulated in phenotype Tumor 0 gene sets are significant at FDR < 25% 0 gene sets are significantly enriched at nominal pvalue < 1% 0 gene sets are significantly enriched at nominal pvalue < 5%

## Sheet: KIRC
Method	Summary Report
ILFS	5 / 10 gene sets are upregulated in phenotype Tumor 0 gene sets are significant at FDR < 25% 0 gene sets are significantly enriched at nominal pvalue < 1% 0 gene sets are significantly enriched at nominal pvalue < 5%
LASSO	1 / 14 gene sets are upregulated in phenotype Tumor 0 gene sets are significant at FDR < 25% 0 gene sets are significantly enriched at nominal pvalue < 1% 0 gene sets are significantly enriched at nominal pvalue < 5%
MRMR	8 / 12 gene sets are upregulated in phenotype Tumor 0 gene sets are significant at FDR < 25% 0 gene sets are significantly enriched at nominal pvalue < 1% 0 gene sets are significantly enriched at nominal pvalue < 5%
NCILFS	75 / 107 gene sets are upregulated in phenotype Tumor 0 gene sets are significant at FDR < 25% 0 gene sets are significantly enriched at nominal pvalue < 1% 1 gene sets are significantly enriched at nominal pvalue < 5%
PLS-DA	10 / 16 gene sets are upregulated in phenotype Tumor 0 gene sets are significant at FDR < 25% 0 gene sets are significantly enriched at nominal pvalue < 1% 0 gene sets are significantly enriched at nominal pvalue < 5%
RELIEF	13 / 23 gene sets are upregulated in phenotype Tumor 0 gene sets are significant at FDR < 25% 0 gene sets are significantly enriched at nominal pvalue < 1% 0 gene sets are significantly enriched at nominal pvalue < 5%

## Sheet: LIHC
Method	Summary Report
ILFS	22 / 24 gene sets are upregulated in phenotype Tumor 0 gene sets are significant at FDR < 25% 0 gene sets are significantly enriched at nominal pvalue < 1% 0 gene sets are significantly enriched at nominal pvalue < 5%
LASSO	18 / 54 gene sets are upregulated in phenotype Tumor 0 gene sets are significant at FDR < 25% 0 gene sets are significantly enriched at nominal pvalue < 1% 0 gene sets are significantly enriched at nominal pvalue < 5%
MRMR	1 / 18 gene sets are upregulated in phenotype Tumor 0 gene sets are significant at FDR < 25% 0 gene sets are significantly enriched at nominal pvalue < 1% 0 gene sets are significantly enriched at nominal pvalue < 5%
NCILFS	82 / 116 gene sets are upregulated in phenotype Tumor 0 gene sets are significant at FDR < 25% 0 gene sets are significantly enriched at nominal pvalue < 1% 0 gene sets are significantly enriched at nominal pvalue < 5%
PLS-DA	5 / 26 gene sets are upregulated in phenotype Tumor 0 gene sets are significant at FDR < 25% 0 gene sets are significantly enriched at nominal pvalue < 1% 0 gene sets are significantly enriched at nominal pvalue < 5%
REILEF	3 / 29 gene sets are upregulated in phenotype Tumor 0 gene sets are significant at FDR < 25% 0 gene sets are significantly enriched at nominal pvalue < 1% 0 gene sets are significantly enriched at nominal pvalue < 5%

## Sheet: PRAD
Method	Summary Report
ILFS	15 / 29 gene sets are upregulated in phenotype Tumor 0 gene sets are significant at FDR < 25% 0 gene sets are significantly enriched at nominal pvalue < 1% 0 gene sets are significantly enriched at nominal pvalue < 5%
LASSO	11 / 25 gene sets are upregulated in phenotype Tumor 0 gene sets are significant at FDR < 25% 0 gene sets are significantly enriched at nominal pvalue < 1% 0 gene sets are significantly enriched at nominal pvalue < 5%
MRMR	4 / 9 gene sets are upregulated in phenotype Tumor 0 gene sets are significant at FDR < 25% 0 gene sets are significantly enriched at nominal pvalue < 1% 0 gene sets are significantly enriched at nominal pvalue < 5%
NCILFS	103 / 110 gene sets are upregulated in phenotype Tumor 23 gene sets are significant at FDR < 25% 2 gene sets are significantly enriched at nominal pvalue < 1% 13 gene sets are significantly enriched at nominal pvalue < 5%
PLS-DA	11 / 34 gene sets are upregulated in phenotype Tumor 0 gene sets are significant at FDR < 25% 0 gene sets are significantly enriched at nominal pvalue < 1% 0 gene sets are significantly enriched at nominal pvalue < 5%
RELIEF	19 / 35 gene sets are upregulated in phenotype Tumor 0 gene sets are significant at FDR < 25% 0 gene sets are significantly enriched at nominal pvalue < 1% 0 gene sets are significantly enriched at nominal pvalue < 5%
